# Supplementary material for: The role of polyethylenimine in enhancing the efficiency of quantum dot light-emitting devices
Source: Royal Society of Chemistry journal article supplement (doi:10.1039/c7nr07683e), 2018-01-01
Supplement: c7nr07683e1.pdf [file c7nr07683e1.pdf]

## Electronic Supplementary Information

### The Role of Polyethylenimine in Enhancing the Efficiency of Quantum Dot Light-Emitting Devices

T. Davidson-Hall\* and H. Aziz

Department of Electrical and Computer Engineering and Waterloo Institute for Nanotechnology, University of Waterloo, 200 University Avenue West, Waterloo, Ontario N2L 3G1, Canada

Email: [tadavids@uwaterloo.ca](mailto:tadavids@uwaterloo.ca)

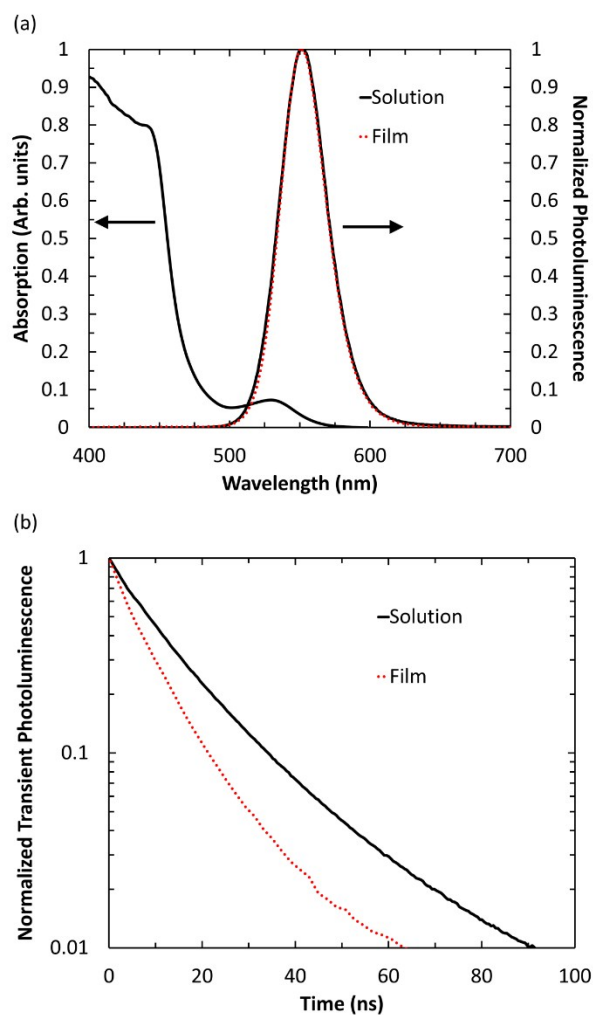

**Fig. S1.** (a) Absorption spectrum of QD rods in solution and photoluminescence spectra of QD rods in solution (solid black) and film (dotted red). (b) Transient photoluminescence lifetime of QD rods in solution (solid black) and film (dotted red).

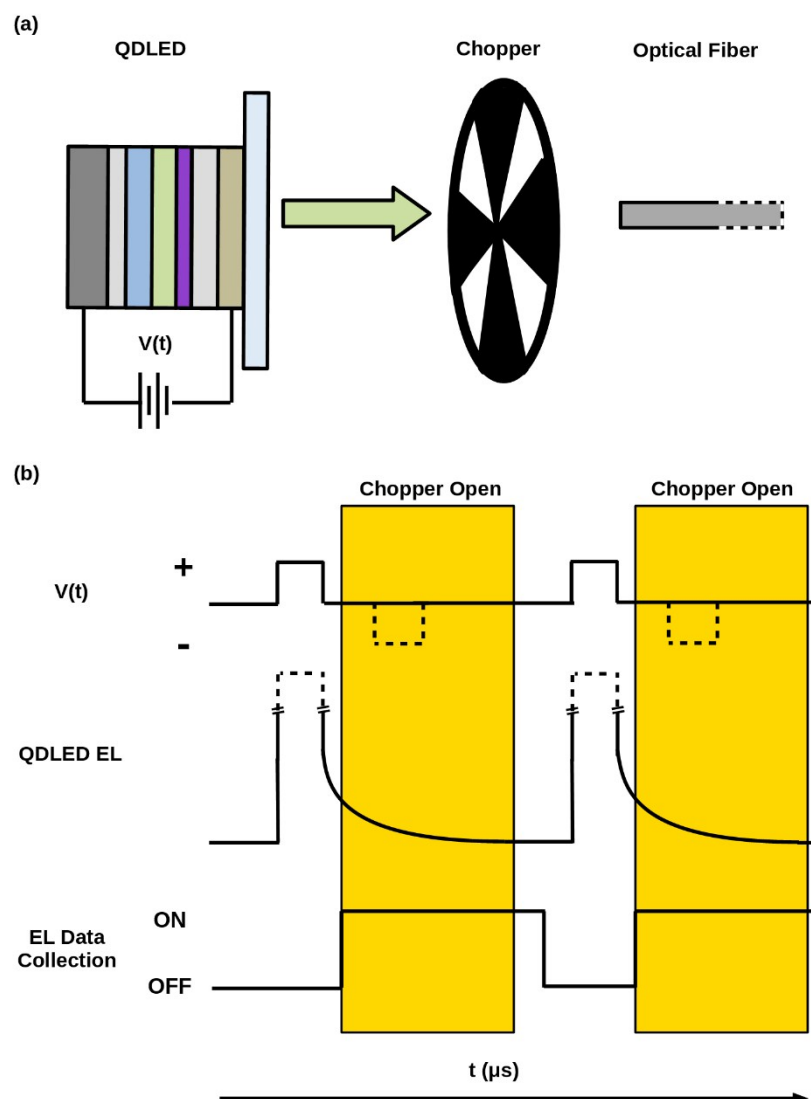

**Fig. S2.** (a) Schematic representation of the delayed electroluminescence experimental setup. (b) An outline of time-resolved QDLED driving scheme, prompt and delayed electroluminescence, chopper position, and data acquisition throughout the delayed electroluminescence measurement.

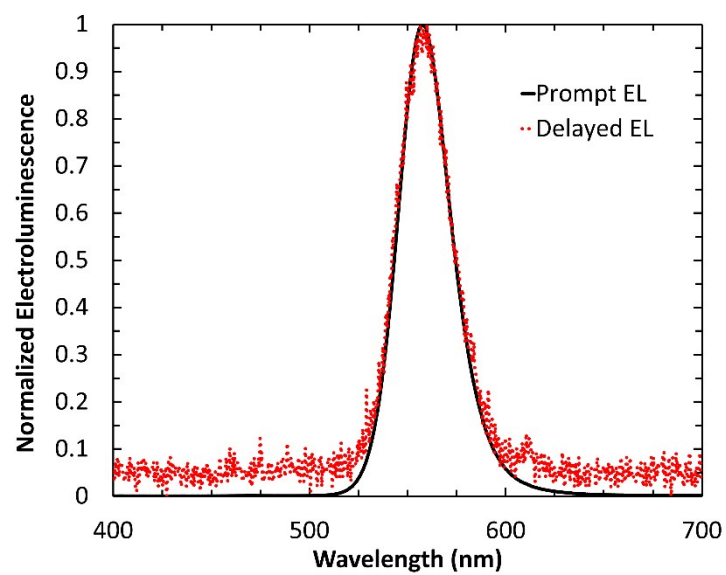

**Fig. S3.** Normalized spectra for prompt (solid black) and delayed (dotted red) electroluminescence components.
